# Supplementary material for: Disruption of tp53 leads to cutaneous nevus and melanoma formation in Xenopus tropicalis
Source: PubMed Central journal article supplement (PMC9533689; doi:10.1002/1878-0261.13301), 2022-08-18
Supplement: MOL2-16-3554-s002.pdf [file MOL2-16-3554-s002.pdf]

## Supplementary Figures for

Disruption of *tp53* leads to cutaneous nevus and melanoma formation in

*Xenopus tropicalis*

Rensen Ran<sup>†</sup>, Lanxin Li<sup>†</sup>, Zhaoying Shi<sup>†</sup>, Guanghui Liu, Hao Jiang, Liangchen Fang,

Tingting Xu, Jixuan Huang, Weiqi Chen, and Yonglong Chen<sup>\*</sup>

<sup>\*</sup>Correspondence to: chenyl@sustech.edu.cn

**This PDF file includes:**

Figs.S1 to S3

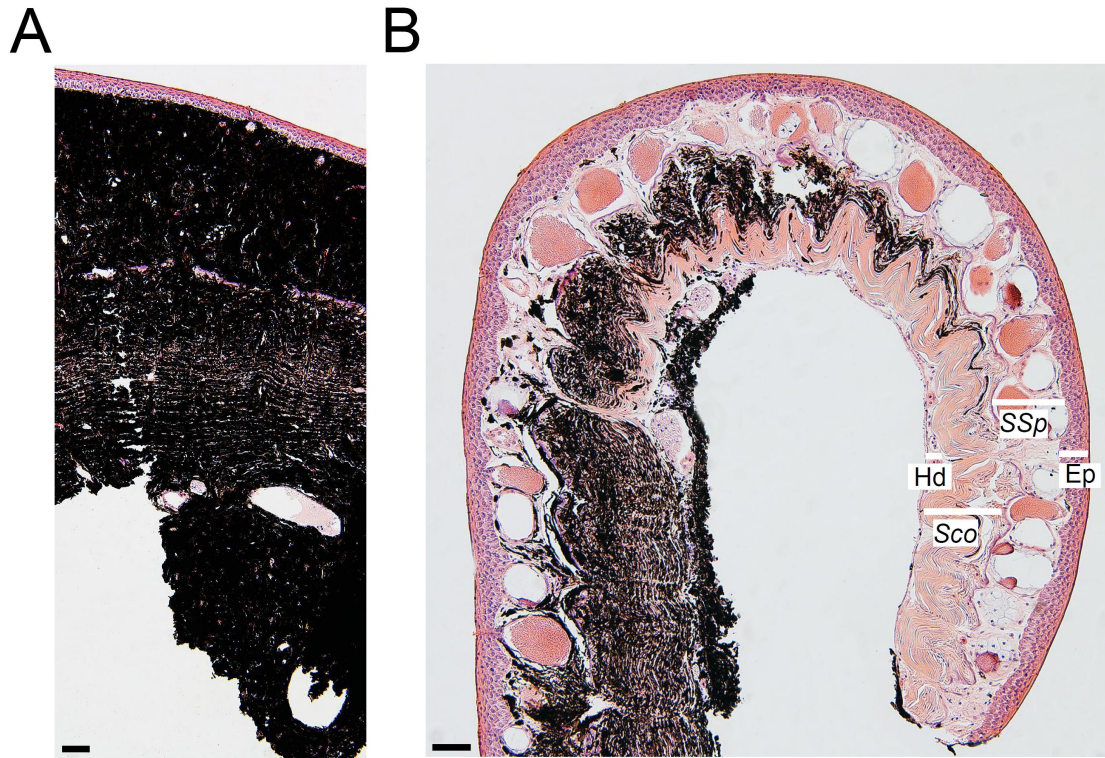

**Fig. S1.** Invasive melanoma developed in a 20-months old *tp53<sup>A7/A7</sup>* frog, as shown in Fig. 4. Scale bars, 50  $\mu\text{m}$ .

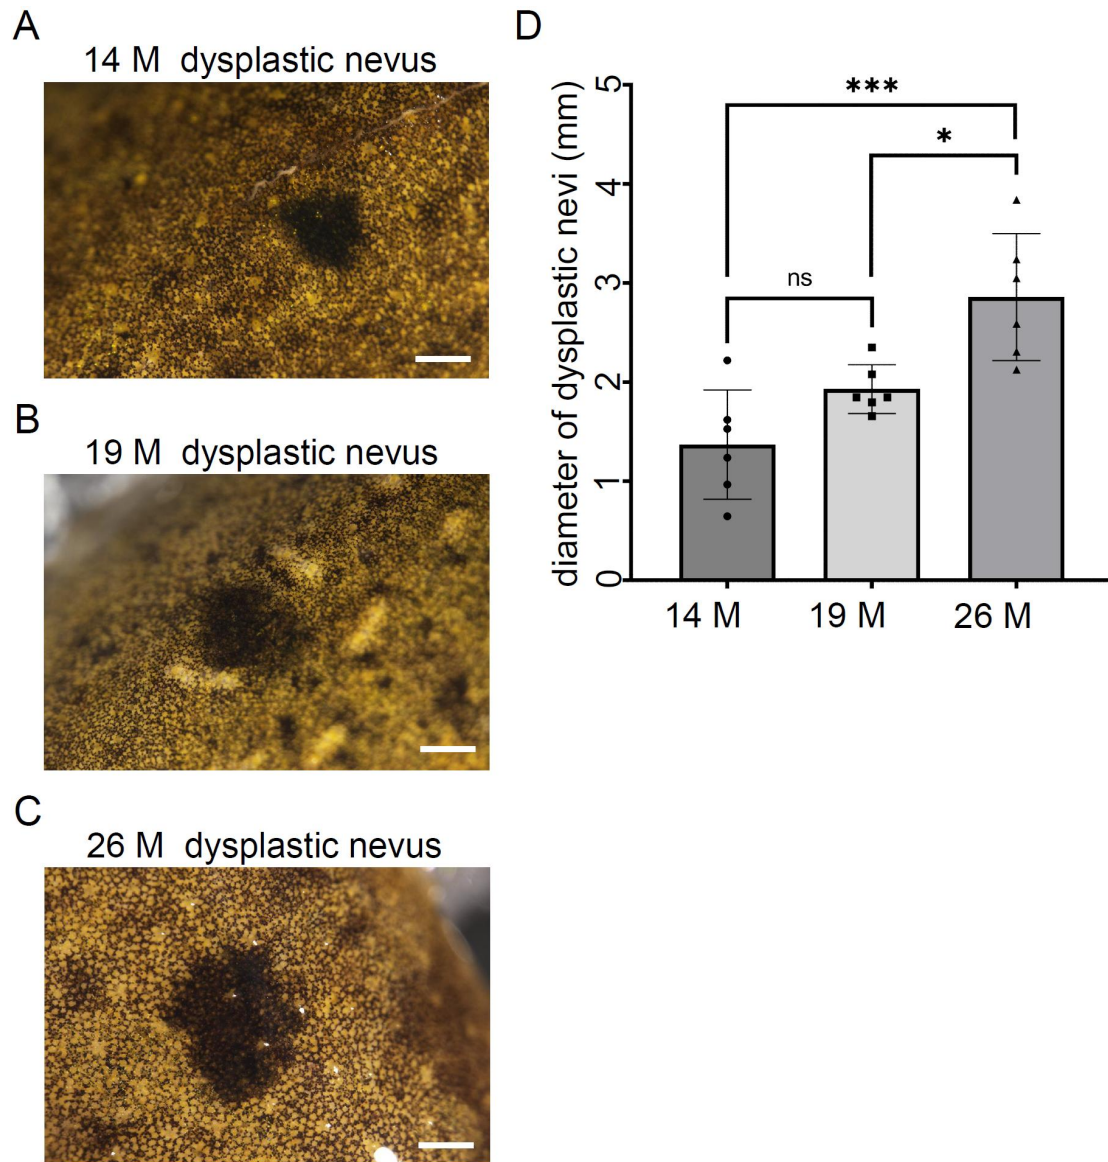

**Fig. S2. Average size of the dysplastic nevi in  $tp53^{A7/A7}$  frogs increased over time. (A-C)** Representative morphology of the lesions. Scale bars, 1 mm. **(D)** Statistics (mean values  $\pm$  SD) on the diameter measurements selectively for dysplastic nevi in  $tp53^{A7/A7}$  frogs. Benign nevus, dysplastic nevus, and melanoma in situ can be distinguished by their darkness and shape alive. GraphPad Prism 9 was used for the t-test (\*  $p < 0.05$ , \*\*\*  $p < 0.001$ , ns, no significant difference). M, months.

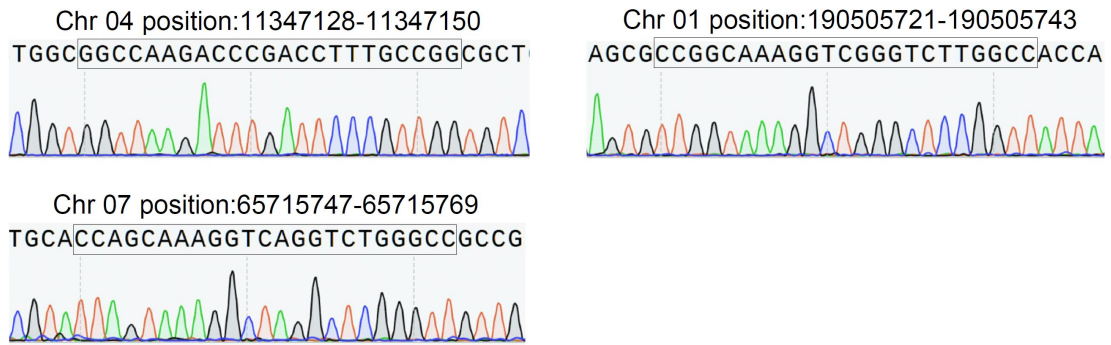

**Fig. S3. Sanger DNA sequencing data show no mutations in the three potential off-target loci predicted by CRISPOR.**
